# Supplementary material
Source: Springer Nature journal article supplement (https://www.springermedizin.de/resource/supplementary/12906_2009_296_MOESM2_ESM.pdf/9519354)
Supplement: MOESM2 [file 9519354]

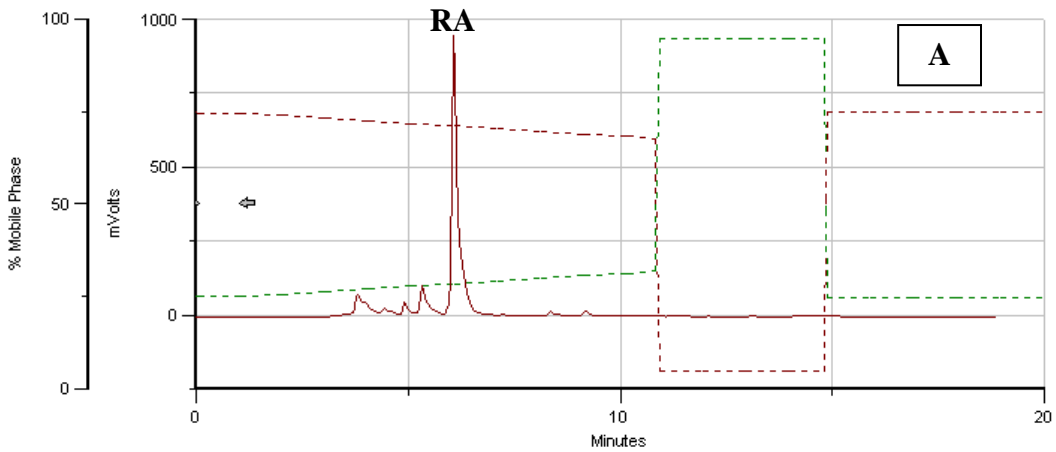

— c:\gilson\unipoint\flavone\mint330.006\mint330.gdt : 330 nm : OCT 6 CUP1: Inj. Number: 6  
 - - - Water/Phosphoric  
 - - - Acetonitrile

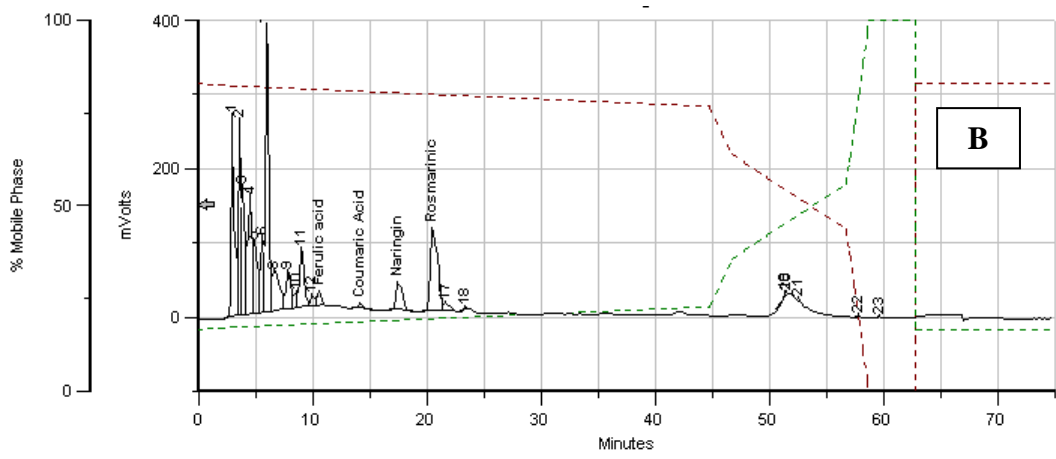

— > c:\gilson\unipoint\flavone\varieas.015\varieas.gdt : 320 nm : Enz Digest New: Inj. Number: 4  
 - - - Water/Phosphoric  
 - - - Acetonitrile
